# Supplementary material for: Precise estimation of residue relative solvent accessible area from Cα atom distance matrix using a deep learning method
Source: Oxford University Press journal article supplement (doi:10.1093/bioinformatics/btab616), 2021-08-27
Supplement: btab616_supplementary_data.docx [file btab616_supplementary_data.docx]

**Table S1:** The maximum solvent accessible area(SA) of the residues. Residue relative solvent accessible area(RSA) value equals the residue SA are divided by the maximum SA of the residues

| *Amino Acid Type* | *SA value* | *Amino Acid Type* | *SA value* |
| --- | --- | --- | --- |
| *Alanine(Ala, A)* | *115* | *Methionine(Met,M)* | *185* |
| *Cysteine(Cys, C)* | *135* | *Asparagine(Asn,N)* | *160* |
| *Aspartic(Asp, D)* | *150* | *Proline(Pro, P)* | *145* |
| *Glutamic(Glu, E)* | *190* | *Glutamine(Gln, Q)* | *180* |
| *Phenylalanine(Phe,F)* | *210* | *Arginine(Arg, R)* | *225* |
| *Glycine(Gly, G)* | *75* | *Serine(Ser, S)* | *115* |
| *Histidine(His, H)* | *195* | *Threonine(Thr, T)* | *140* |
| *Isoleucine(Ile, I)* | *175* | *Valine(Val, V)* | *155* |
| *Lysine(Lys, K)* | *200* | *Tryptophan(Trp,W)* | *255* |
| *Leucine(Leu, L)* | *170* | *Tyrosine(Tyr, Y)* | *230* |
